# Supplementary material for: A nomogram model integrating ultrasound-based multimodal radiomics features and clinical indexes for diagnosing significant hepatic fibrosis in AILD patients
Source: Research Square preprint supplement (doi:10.21203/rs.3.rs-7801078/v1), 2025-10-21
Supplement: Supplementary file 1 [file c6c9ba4aff1b80a7cb9d01df.docx]

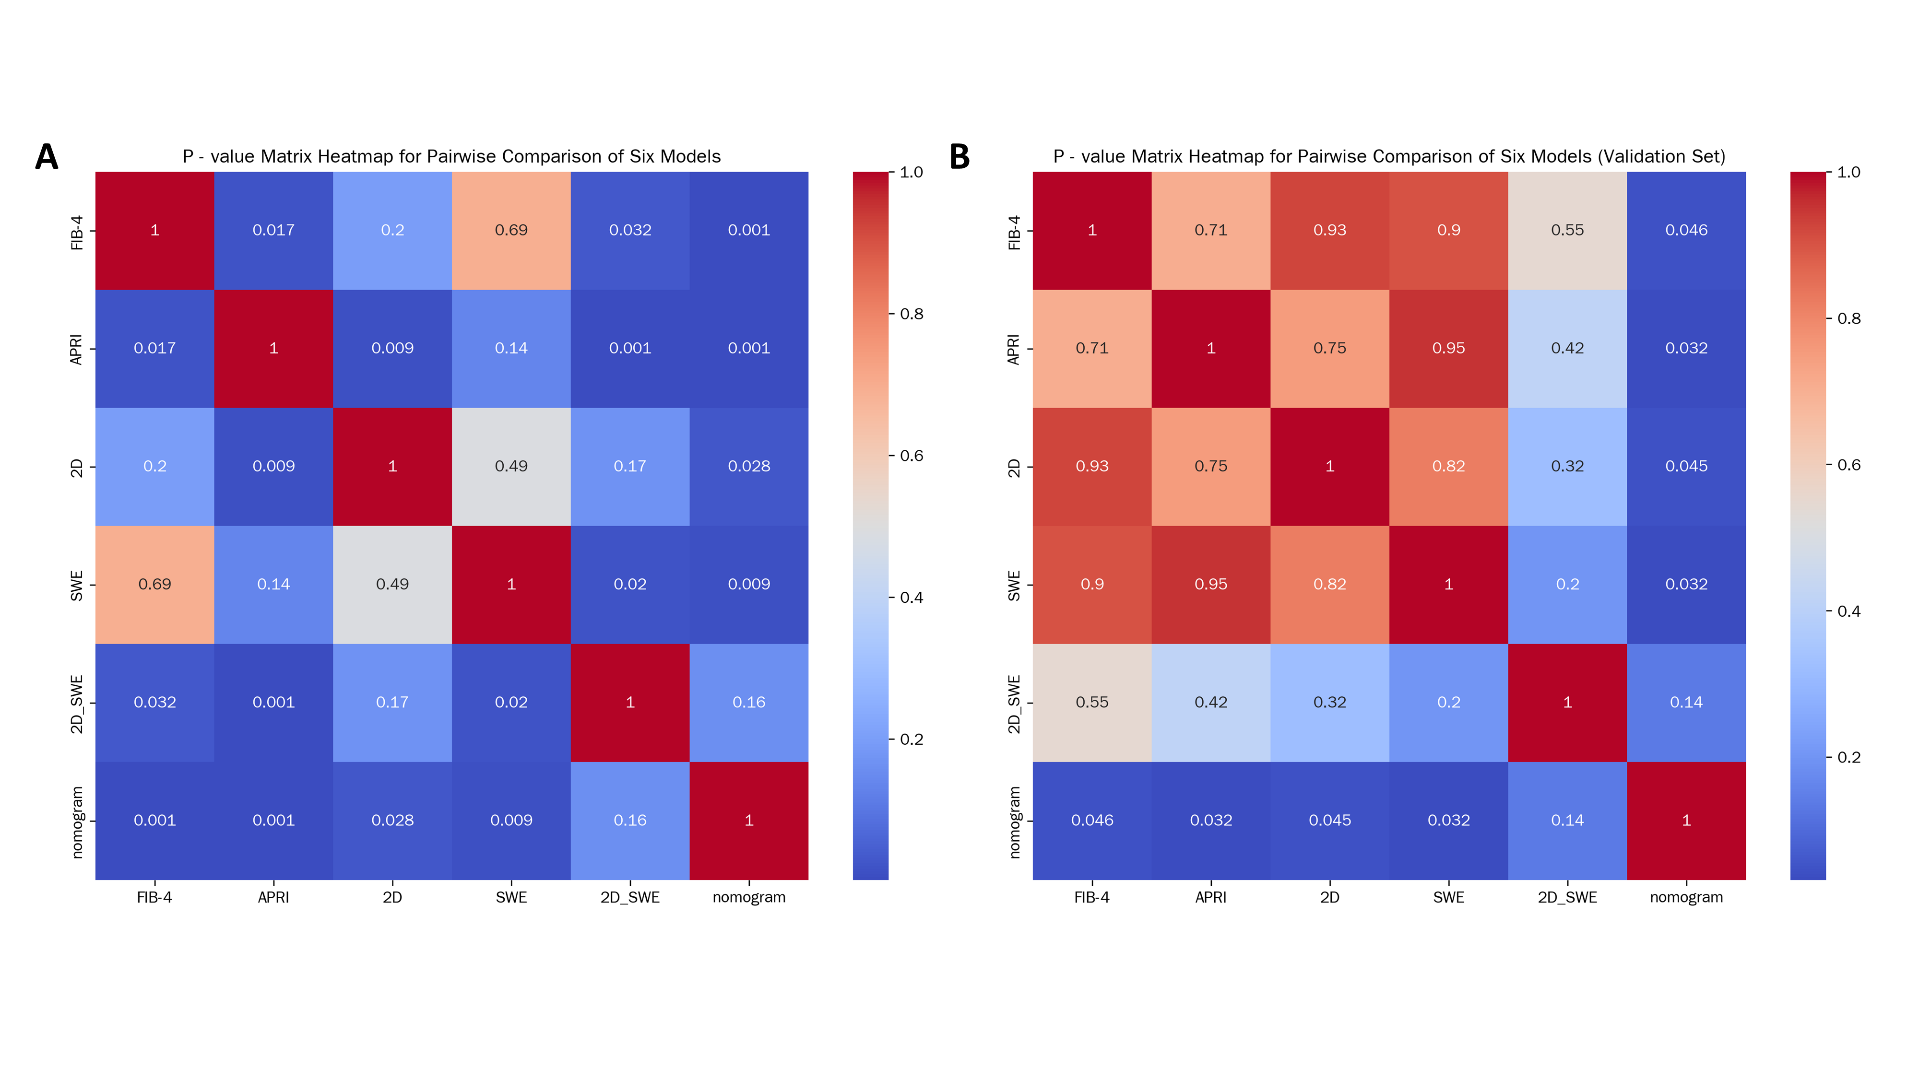


**Supplementary figure 1** Heatmaps of Delong Test Matrices for Six Models in the Training (A) and Validation Cohorts (B).

In the training cohort, the Nomogram model demonstrated the most exceptional diagnostic performance, with its AUC value being significantly higher than those of all single-indicator models (all P < 0.05). Although the difference between the Nomogram and the 2D_SWE combined model did not reach statistical significance (P = 0.158), the Nomogram still exhibited a superior trend in AUC value. Consistent with the training set results, the DeLong test confirmed the superiority and generalizability of the Nomogram model, as it significantly outperformed all single-parameter models in the independent validation cohort (all P < 0.05).

In the validation cohort, no statistically significant differences were observed between the 2D_SWE combined model and any single model (all P > 0.2). This finding markedly contrasts with the training set results, where the 2D_SWE model significantly outperformed both FIB-4 and APRI, potentially indicating the presence of overfitting in the validation cohort.

**Supplementary table 1** Radiomics score (Rad-score) is displayed as follows:

Rad-score=1.0570475591991109

+0.733240*original_shape_Maximum2DDiameterRow

+0.520040 * wavelet_HHH_gldm_DependenceVariance

+0.462331 * wavelet_LHH_gldm_SmallDependenceHighGrayLevelEmphasis

-0.123747 * wavelet_LHL_firstorder_90Percentile

-0.211632 * wavelet_LLL_glszm_SmallAreaHighGrayLevelEmphasis

+0.008412 * wavelet_LLL_ngtdm_Complexity

-0.329088 * exponential_glszm_GrayLevelNonUniformity_SWE

-0.310136 * lbp_3D_k_glrlm_RunVariance_SWE

+0.359651 * logarithm_glcm_Idm_SWE

+0.341203 * wavelet_LHL_glcm_Idn_SWE
